# Supplementary material for: A novel molecularly expanded covalent triazine framework heterojunction with significantly enhanced molecular oxygen activation and photocatalysis performance under visible light
Source: Royal Society of Chemistry journal article supplement (doi:10.1039/d3dt01726e), 2023-01-01
Supplement: d3dt01726e1.pdf [file d3dt01726e1.pdf]

## **Electronic supplementary information (ESI)**

### **A novel molecular expanded covalent triazine framework heterojunctions with significantly enhanced molecular oxygen activation and photocatalysis performance under visible light**

Yuxuan Shao,<sup>a</sup> Dan You,<sup>a</sup> Yuqi Wan,<sup>a,b\*</sup> Qingrong Cheng,<sup>a\*</sup> and Zhiquan Pan<sup>a</sup>

<sup>a</sup> School of Chemistry and Environmental Engineering, Wuhan Institute of Technology, Wuhan, 430205, PR China.

<sup>b</sup> The Department of Electrical and Electronic Engineering, The University of Hong Kong, Hong Kong, 999077, PR China.

Corresponding authors:

\*(Q.C.) E-mail: [chengqr383121@sina.com](mailto:chengqr383121@sina.com)

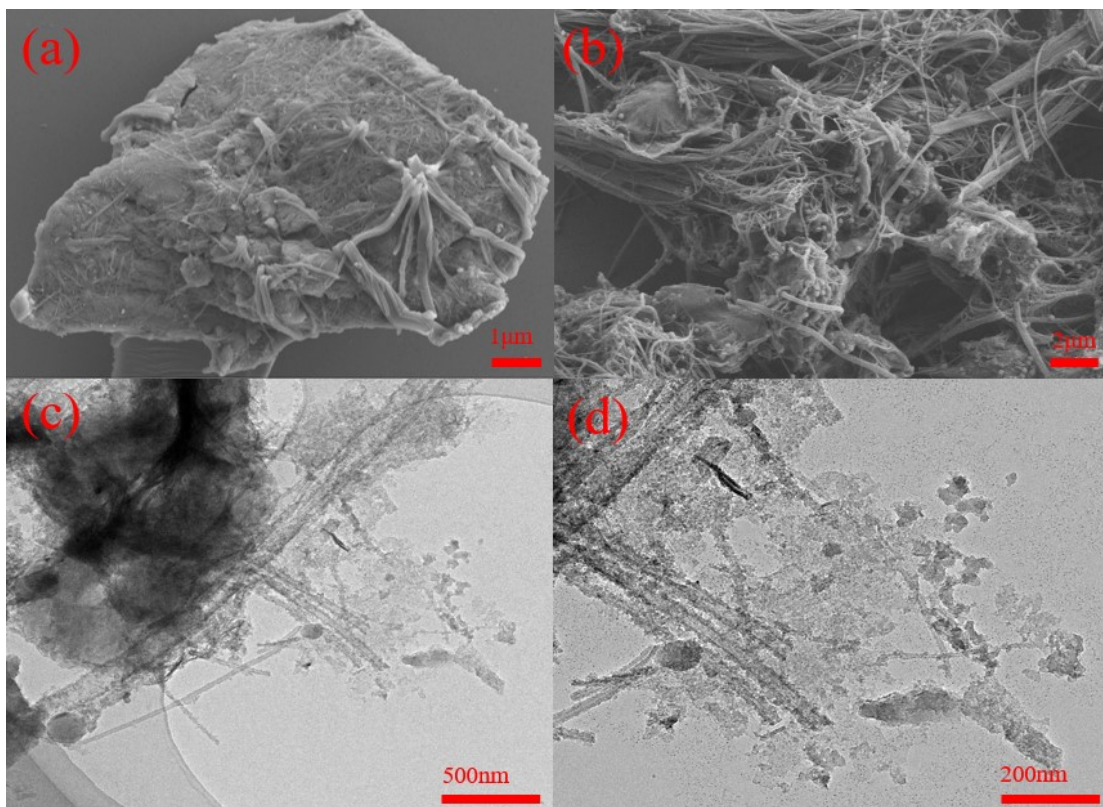

**Fig.S1** (a) SEM image of CTF-1 (b) SEM image of CTF-1-G (c) and (d) TEM image of CTF-1-G in size of 200 nm and 500 nm, respectively.

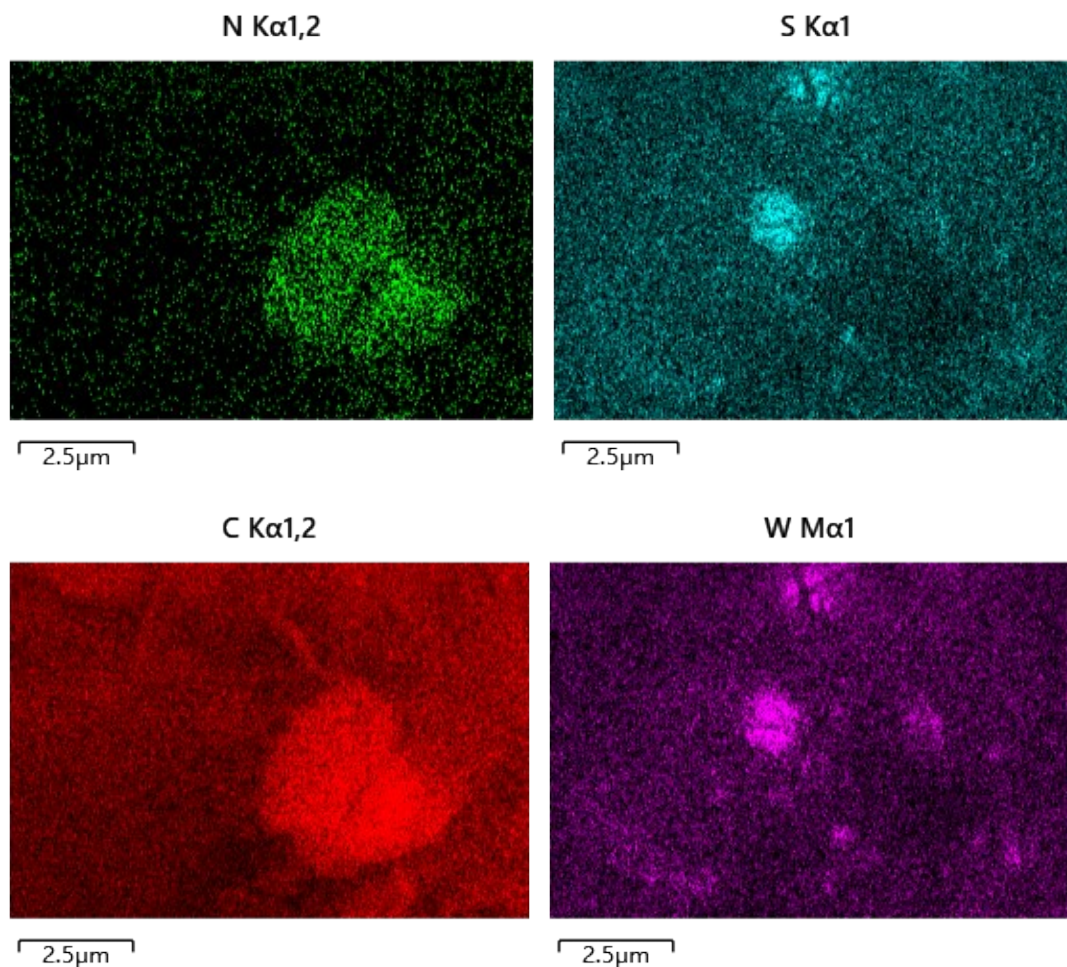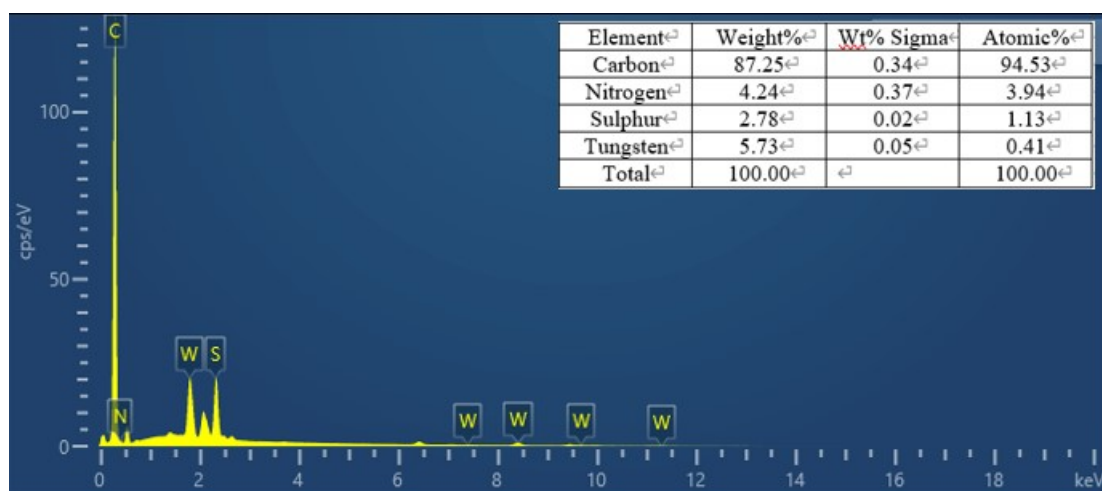

Fig.S2 N, S, C and W STEM EDX mapping of C-GW<sub>15</sub>.

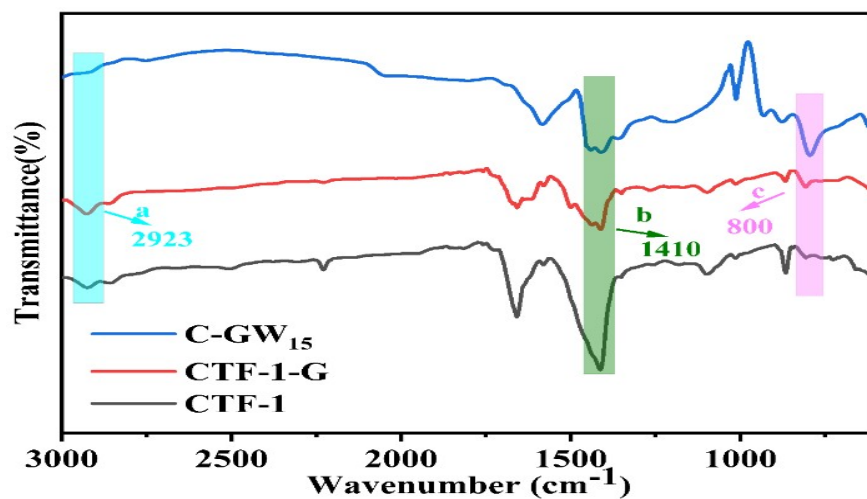

Fig.S3 IR spectra of CTF-1, C-F-1-G and heterojunction C-GW<sub>15</sub>

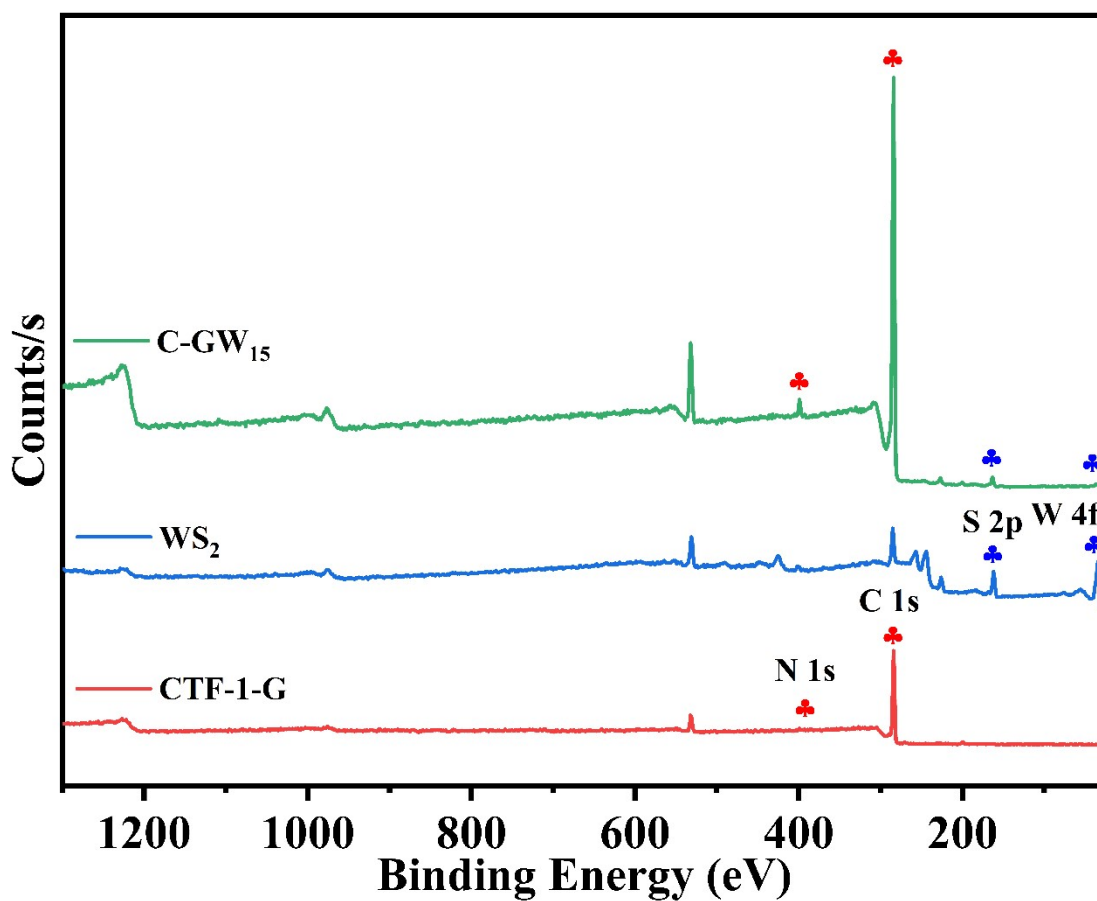

Fig.S4 XPS spectra of CTF-1-G, WS<sub>2</sub> and C-GW<sub>15</sub>.

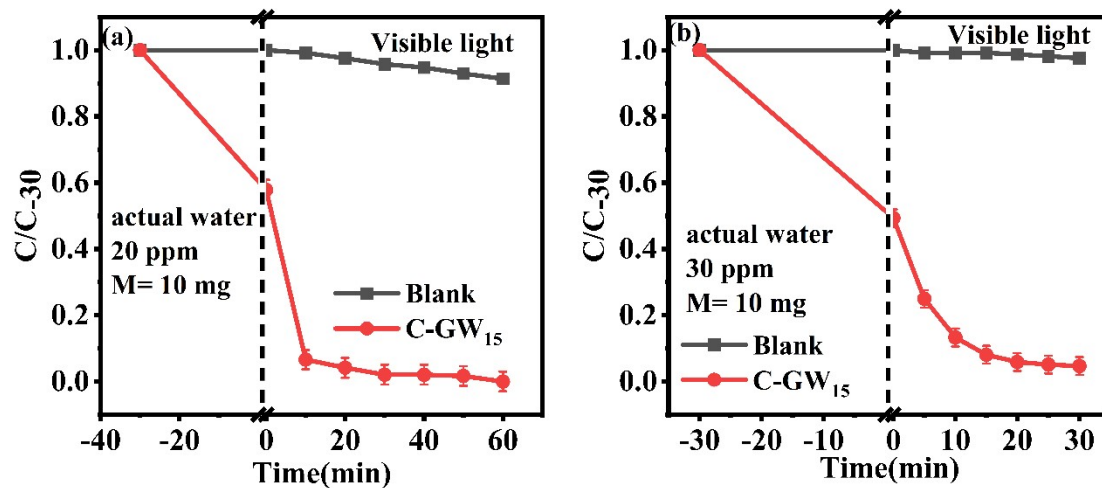

Fig. S5 (a) Photocatalytic degradation curves of TC over C-GW<sub>15</sub>; (b) Photocatalytic degradation curves of RHB over C-GW<sub>15</sub>.

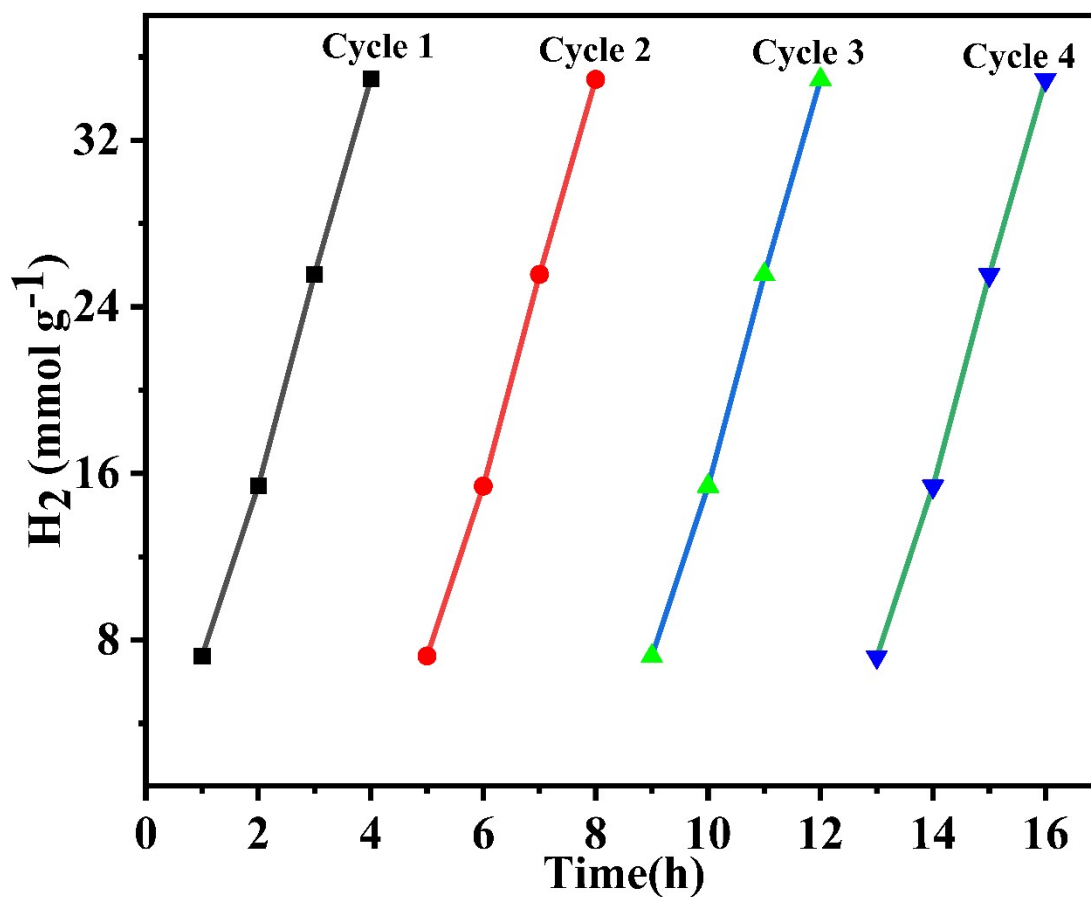

Fig. S6 H<sub>2</sub> produced by C-GW<sub>15</sub> for 4 consecutive cycles in every 4h time interval.

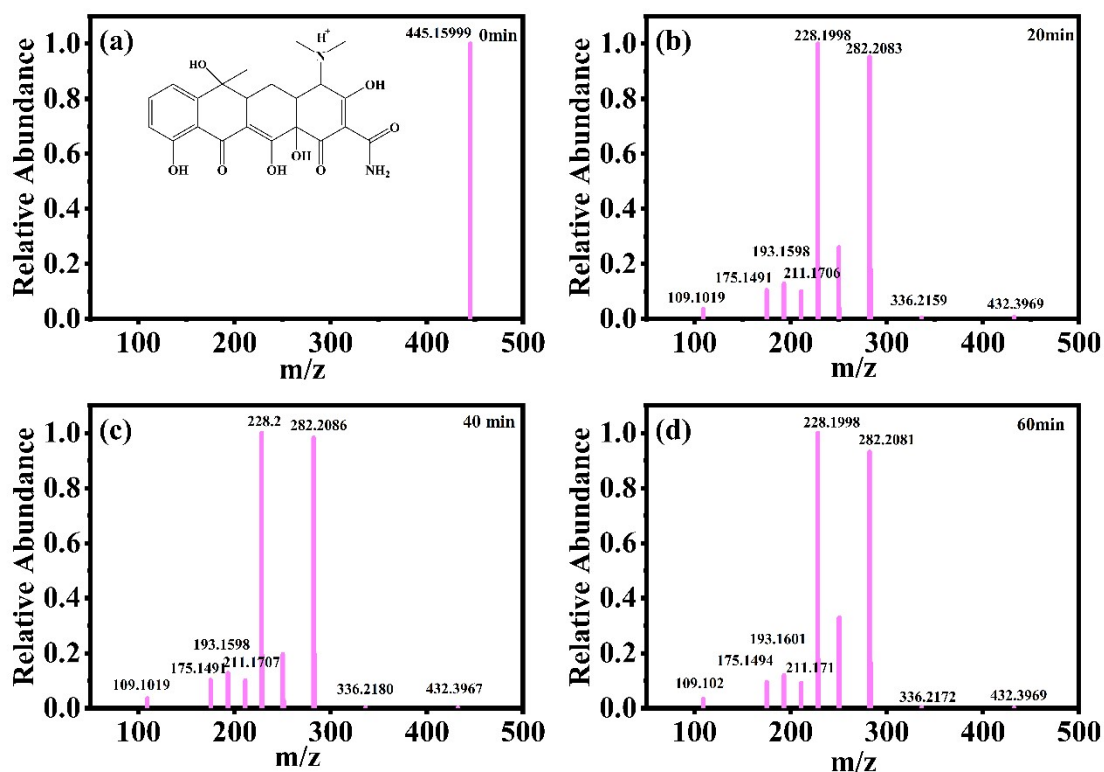

Fig.S7 Variations in the relative intensity of intermediate products of TC with different reaction time, as obtained in the LC-MS spectra.

Table.S1 Comparison of WS<sub>2</sub> Based heterojunction for Photocatalytic RhB Degradation.

| Catalyst / mg                    | V (mL) /<br>C <sub>30</sub><br>(mg·L <sup>-1</sup> ) | Light source  | Time (min) | Result (%) | TOF   | Ref       |
|----------------------------------|------------------------------------------------------|---------------|------------|------------|-------|-----------|
| CTF-1-G/WS <sub>2</sub> /10      | 50/30                                                | Visible light | 35         | 98%        | 4.2   | This work |
| WS <sub>2</sub> Q.Dots/ BiOCl/20 | 100/20                                               | Visible light | 20         | 80.1%      | 4.005 | [1]       |
| WS <sub>2</sub> /AgI /50         | 150/10                                               | Visible light | 30         | 91.2%      | 0.912 | [2]       |

Table S2 Comparison of the photocatalytic H<sub>2</sub> evolution rates over different photocatalysts.

| Photocatalysts | Irrigation | Sacrificial agents | Activity<br>μmol·g <sup>-1</sup> h <sup>-1</sup> | Ref |
|----------------|------------|--------------------|--------------------------------------------------|-----|
|----------------|------------|--------------------|--------------------------------------------------|-----|



|                                                      |               |                                                       |         |           |
|------------------------------------------------------|---------------|-------------------------------------------------------|---------|-----------|
| CTF-1-G/WS <sub>2</sub>                              | Visible light | Na <sub>2</sub> SO <sub>3</sub> and Na <sub>2</sub> S | 8735.65 | This work |
| WS <sub>2</sub> /g-C <sub>3</sub> N <sub>4</sub>     | Sun light     | TEOA                                                  | 154     | [3]       |
| WS <sub>2</sub> /ZnIn <sub>2</sub> S <sub>4</sub>    | Visible light | Na <sub>2</sub> SO <sub>3</sub> and Na <sub>2</sub> S | 199.1   | [4]       |
| Eh-WS <sub>2</sub>                                   | Sunlight      | Lactic acid                                           | 113.56  | [5]       |
| FL-WS <sub>2</sub> /CdLa <sub>2</sub> S <sub>4</sub> | Visible light | Na <sub>2</sub> S and Na <sub>2</sub> SO <sub>3</sub> | 3330    | [6]       |

## Reference

- [1] P. Xiao, J. Lou, H. Zhang, W. Song, X.-L. Wu, H. Lin, J. Chen, S. Liu, X. Wang, Enhanced visible-light-driven photocatalysis from WS<sub>2</sub> quantum dots coupled to BiOCl nanosheets: synergistic effect and mechanism insight, *Catalysis Science & Technology*, 8 (2018) 201-209.
- [2] X.F. Wu, H. Li, Y. Zhang, J.R. Zhang, J.Z. Su, Y.M. Feng, W.G. Zhang, L.S. Sun, X.G. Sun, Synthesis of AgI/WS<sub>2</sub> hybrids as a novel photocatalyst with efficient degradation of rhodamine B, *Micro & Nano Letters*, 14 (2019) 173-177.
- [3] Y. Zhou, X. Ye, D. Lin, One-pot synthesis of non-noble metal WS<sub>2</sub>/g-C<sub>3</sub>N<sub>4</sub> photocatalysts with enhanced photocatalytic hydrogen production, *International Journal of Hydrogen Energy*, 44 (2019) 14927-14937.
- [4] J. Zhou, D. Chen, L. Bai, L. Qin, X. Sun, Y. Huang, Decoration of WS<sub>2</sub> as an effective noble-metal free cocatalyst on ZnIn<sub>2</sub>S<sub>4</sub> for enhanced visible light photocatalytic hydrogen evolution, *International Journal of Hydrogen Energy*, 43 (2018) 18261-18269.
- [5] G. Koyyada, S.V. Prabhakar Vattikuti, S. Shome, J. Shim, V. Chitturi, J.H. Jung, Enhanced solar light-driven photocatalytic degradation of pollutants and hydrogen evolution over exfoliated hexagonal WS<sub>2</sub> platelets, *Materials Research Bulletin*, 109 (2019) 246-254.
- [6] X. Liu, X. Chen, S. Wang, L. Yan, J. Yan, H. Guo, F. Yang, J. Lin, Promoting the photocatalytic H<sub>2</sub> evolution activity of CdLa<sub>2</sub>S<sub>4</sub> nanocrystalline using few-layered WS<sub>2</sub> nanosheet as a co-catalyst, *International Journal of Hydrogen Energy*, 47 (2022) 2327-2337.
